# Supplementary material for: IgG-Based Bispecific Anti-CD95 Antibodies for the Treatment of B Cell-Derived Malignancies and Autoimmune Diseases
Source: MDPI journal article supplement (doi:10.3390/cancers14163941), 2022-08-16
Supplement: s1 [file s1]

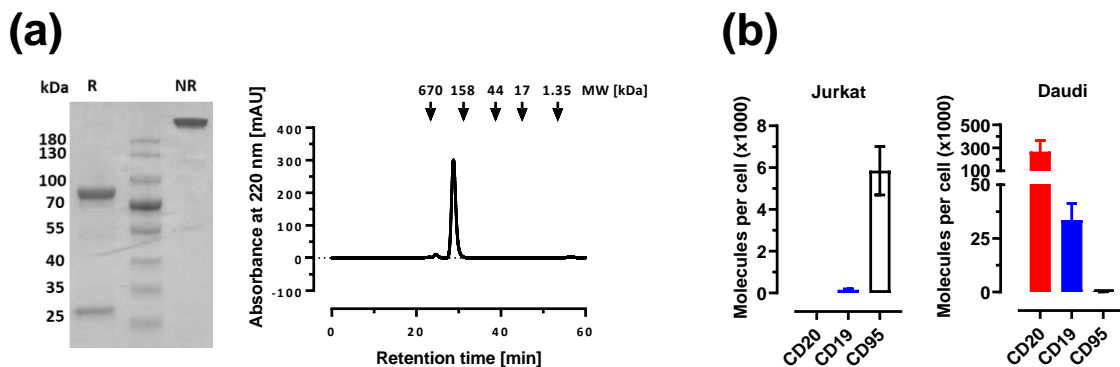

**Figure S1.** Biochemical characterization of CD95xMOPC and quantitative analysis of antigen expression on Jurkat and Daudi cells. **(a)** SDS-PAGE (left) and analytical size exclusion chromatography (SEC) (right) of the CD95xMOPC molecule. R: reduced; NR: non-reduced. **(b)** The expression of CD95, CD20 and CD19 on Jurkat (left) and Daudi (right) cells was calculated using the flow cytometry-based Qifikit system. Mean $\pm$ SD, n=3.

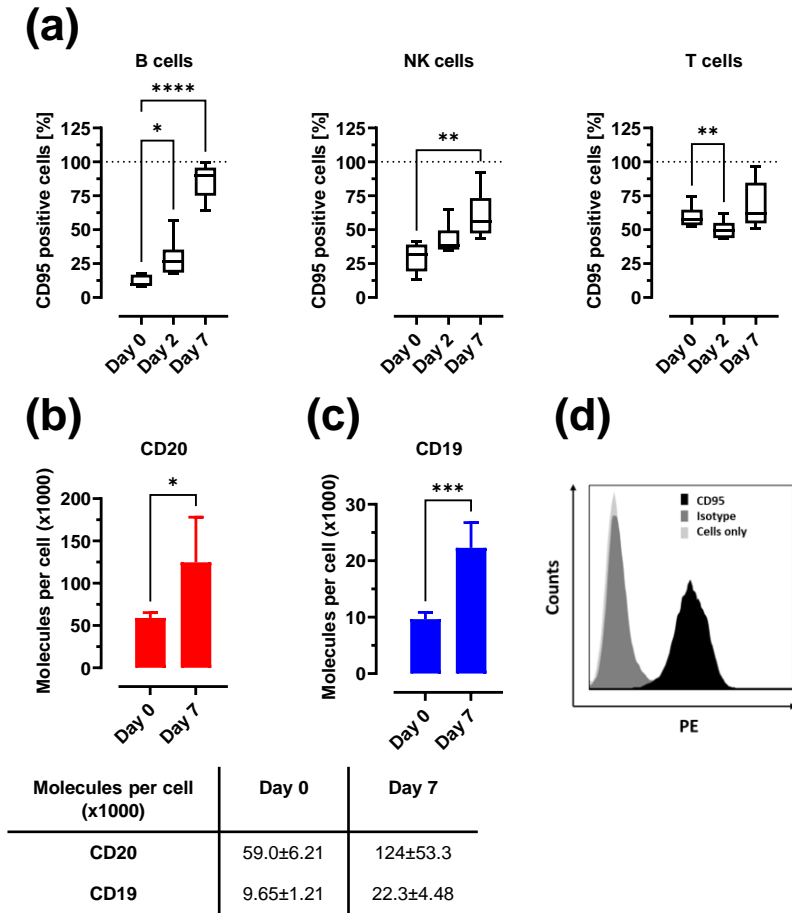

**Figure S2.** Antigen expression on resting and activated lymphocytes. **(a-c)** To activate B cells, PBMCs were stimulated for 7 days with 0.1  $\mu$ M of ODN2006. **(a)** The expression of CD95 on different lymphocyte populations was verified at different time points via flow cytometry. Boxplot and whiskers from six different donors. Statistics were calculated with One-Way ANOVA. Day 0 versus day 2 or day 7. **(b)** and **(c)** The antigen density of CD20 (A) and CD19 (B) on the cell surface of resting or activated B cells was calculated using the flow cytometry-based Qifikit system. The corresponding analysis is presented in the table under the graph. Mean $\pm$ SD from six different donors. Statistics were calculated using a paired t-test. **(d)** Expression of CD95 on LX-1 hepatic stellate cells.
